# Supplementary material
Source: Springer Nature journal article supplement (https://www.springermedizin.de/resource/supplementary/12936_2013_3240_MOESM3_ESM.pdf/9545428)

Day 7 lumefantrine concentrations ng/ml

6000.0  
5000.0  
4000.0  
3000.0  
2000.0  
1000.0  
0

1

Parasite re-appearance

**BLOOD SLIDE**

2

No parasite re-appearance

\*

○

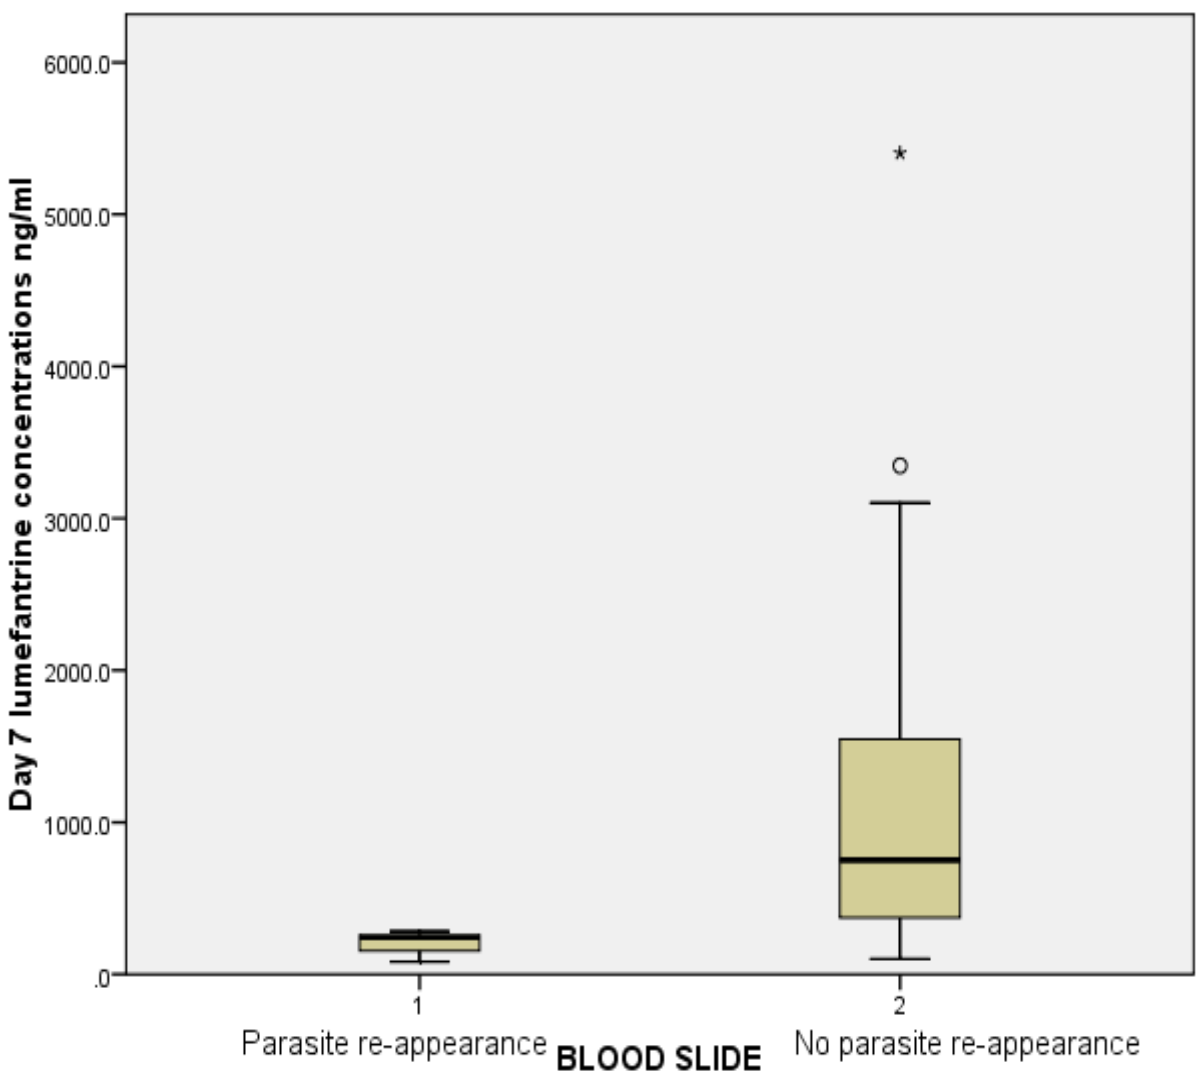

Supplement: MOESM3 [file 9545428]
